# Supplementary material for: Staphylococcus aureus and methicillin-resistant Staphylococcus aureus in juvenile green turtle (Chelonia mydas) carcasses, rearing seawater, feed and their antibiotic resistances
Source: PeerJ. 2025 Jun 20;13:e19579. doi: 10.7717/peerj.19579 (PMC12184670; doi:10.7717/peerj.19579)
Supplement: Supplemental Information 5 [file peerj-13-19579-s005.xlsx]

## Sheet: Sheet1
	Antibiotic resistance of Staphylococcus aureus from rearing
	S.aureus	Penicillin	Cefazolin	Ampicillin	Cefoxitin	Streptomycin	Gentamicin	Kanamycin	Tobramycin	Amikacin(3	Chloramphenicol	Tetracyline
	id	(10µg)	(30µg)	(10µg)	(30µg)	(10µg)	(10µg)	(30µg)	(10µg)	0µg)	(30µg)	30µg)
		rearing seawater
	SASAP5	S	S	S	S	S	S	S	S	S	S	S
	SA3M5	S	R	S	S	S	S	S	S	S	S	S
	SA71P5	S	I	S	S	S	S	S	S	S	S	S
	SA5M51	S	S	S	S	S	S	S	S	S	S	S
	SA11P5	S	S	S	S	S	S	S	S	S	S	S
	SA1P5	S	S	S	S	S	S	S	S	S	S	S
	SA9M5	S	S	S	S	S	S	S	S	S	S	S
	SA91P5	S	S	S	S	S	S	S	S	S	S	S
	SAM135	S	S	S	S	S	S	S	S	S	S	S
	SA101P5	S	S	S	S	S	S	S	S	S	S	S
	SA41P5	S	S	S	S	S	S	S	S	S	S	S
	SA4M5	R	R	R	S	S	S	S	S	S	S	S
	SAP215	S	S	S	I	R	R	R	R	R	R	R
	SA61P5	S	S	S	S	R	S	S	S	S	S	S
	SAP1212	R	S	I	S	S	S	S	S	S	S	S
	SA31111	R	S	I	S	S	S	S	S	S	S	S
	SA31112	R	S	S	S	R	S	S	S	S	S	S
	SA31100	R	I	R	S	S	S	S	S	S	S	S
	SAP210	R	S	S	S	S	S	S	S	S	S	S
	SAP1121	S	S	S	S	S	S	S	S	S	S	S
	SAP1110	S	S	S	S	S	S	S	S	S	S	S
	SAP1216	S	S	S	S	S	S	S	S	S	S	S
	SA1210	S	S	S	S	S	S	S	S	S	S	S
	SAP1111	S	S	S	S	S	S	S	S	S	R	S
	SAP1215	S	S	S	S	S	S	S	S	S	S	S
	SA2101	S	S	S	S	S	S	S	S	S	S	S
	SA321	R	R	R	R	S	R	R	R	S	S	S
	SAP1112	S	S	S	S	S	S	S	S	S	S	S
	SA2110	R	S	S	S	S	S	S	S	S	S	S
	SA3110	S	S	S	S	S	S	S	S	S	S	S
	SAP21032	S	S	S	S	S	S	S	S	S	S	S
	SAP2103	S	S	S	S	S	S	S	S	S	S	S
	SAP3102	S	S	S	S	S	S	S	S	S	S	R
	SAP3103	S	S	S	S	S	S	S	S	S	S	S
	SAP1113	S	S	S	S	S	S	S	S	S	R	S
	SAP2102	S	S	S	S	S	S	S	S	S	R	S
	SAP2100	S	S	S	S	S	S	S	S	S	S	S
	SAP1114	S	S	S	S	S	S	S	S	S	S	S
	SAP1101	S	S	S	S	S	S	S	S	S	S	S
	SA51P5	R	S	S	S	S	S	S	S	S	R	S
	SA5M52	S	S	S	S	S	S	S	S	S	S	S
	SAP2101	S	S	S	S	S	S	S	S	S	R	S
	SA211	R	R	S	R	S	S	S	S	S	S	R
	SAP1115	S	S	S	S	S	S	S	S	S	S	S
		fish fillet
	s11	S	S	S	S	S	S	S	S	S	S	S
	s12	S	S	S	S	S	S	S	S	S	S	R
	s21	R	S	S	S	S	S	S	S	S	S	S
	s22	S	S	S	S	S	S	S	S	S	R	R
	s23	S	S	S	S	S	S	S	S	S	R	R
	s24	R	S	S	S	S	S	S	S	S	S	R
	s31	I	S	S	S	S	S	S	S	S	R	R
	s32	I	S	S	S	S	S	S	S	S	R	R
	s33	I	S	S	S	S	S	S	S	S	S	S
	s35	S	S	S	S	S	S	S	S	S	S	S
	s36	I	S	S	S	S	S	S	S	S	R	R
	s37	S	S	S	S	S	S	S	S	S	S	S
	s38	I	S	S	S	S	S	S	S	S	S	S
	s39	S	S	S	S	S	S	S	S	S	S	S
	s310	I	S	S	S	S	S	S	S	S	S	S
	s41	S	S	S	S	S	S	S	S	S	S	S
	s42(MRSA	R	S	S	R	S	S	S	S	S	S	S
	s43(MRSA	R	S	R	R	S	S	S	S	S	S	S
	s45	I	S	S	S	S	S	S	S	S	S	S
	s46(MRSA	R	S	R	R	S	S	S	S	S	S	S
	s47	R	S	S	S	S	S	S	S	S	S	R
	s49	R	S	S	S	S	S	S	S	S	S	S
	s51	S	S	S	S	S	S	S	S	S	S	R
		juvenile green turtle carcasses
		pennicillin	cefazolin	amplicillin	cefoxitin	stretomycin	gentamycin	kanamycin	tobramycin	amikacin	chloramphenicol	tetracycline
	sa113	R	S	S	S	S	S	S	ND	S	S	S
	sa116	R	S	S	S	S	S	S	ND	S	I	I
	sa1212	S	S	S	S	S	S	S	ND	S	R	S
	sa1214	S	S	S	S	S	S	S	ND	S	R	S
	sa1218	R	S	I	S	S	S	S	ND	S	S	S
	sa1219	I	S	S	S	S	S	S	ND	S	S	S
	sa1220(MRSA)	R	S	S	R	S	S	S	ND	S	S	S
	sa1221(MRSA)	R	R	R	R	R	I	R	ND	R	S	I
	sa1222	R	S	S	S	S	S	S	ND	S	S	S
	sa36h11	R	S	S	S	R	S	S	S	S	S	R
	sa36h21(MRSA)	R	S	S	R	R	S	R	S	I	S	R
	sa36h31	R	S	R	S	S	S	S	S	S	R	S
	sa36l11(MRSA)	I	R	S	R	S	S	S	S	S	S	S
	sa36l21	R	S	S	S	S	S	S	S	S	S	S
	sa36i11	S	S	S	S	S	S	S	S	S	S	S
	sa36i21(MRSA)	R	R	S	R	S	S	I	S	R	S	R
	sa36s11(MRSA)	R	I	S	R	R	S	I	S	I	R	R
	sa36s21(MRSA)	R	I	S	R	R	S	R	S	R	S	S
	sa37h12	S	S	S	S	S	S	S	S	S	S	S
	sa37h22	I	S	S	S	S	S	S	S	S	S	S
	sa37h32	R	S	S	S	S	S	S	S	S	S	S
	sa37h42	S	S	S	S	S	S	S	S	S	S	S
	sa37i12	S	S	S	S	S	S	S	S	S	S	S
	sa37i22	S	S	S	S	S	S	S	S	S	S	S
	sa37i32	R	S	R	S	S	S	S	S	S	S	R
	sa37s22	S	S	S	S	S	S	S	S	S	S	S
	sa37s32	S	S	S	S	S	S	S	S	S	S	S
	sa37s42	R	S	S	S	S	S	S	S	S	S	S
	sa481h	S	S	S	S	R	S	S	S	S	S	S
	sa484(MRSA)	R	S	S	R	R	S	R	R	R	S	R
	sa483k	R	S	S	S	S	S	S	S	S	S	S
	sa485i	R	S	I	S	S	S	S	S	S	S	S
	sa481k	R	S	I	S	S	S	R	S	S	S	R
	sa483(MRSA)	R	I	S	R	R	S	R	R	R	S	R
	sa491(MRSA)	R	R	R	R	S	S	S	S	S	R	S
	sa495(MRSA)	R	R	R	R	S	S	S	S	S	R	S
	sa4103(MRSA)	R	R	R	R	R	R	R	R	R	S	S
	sa4108h	I	S	S	S	R	S	S	S	S	R	S
	sa4104(MRSA)	R	R	R	R	R	R	R	R	R	R	R
	sa4109h	S	S	S	S	S	S	S	S	S	S	S
